# Supplementary material for: Fast quantitative analysis of timsTOF PASEF data with MSFragger and IonQuant
Source: bioRxiv or medRxiv preprint supplement (doi:10.1101/2020.03.19.999334), 2020-07-03
Supplement: Supplementary file [file media-1.pdf]

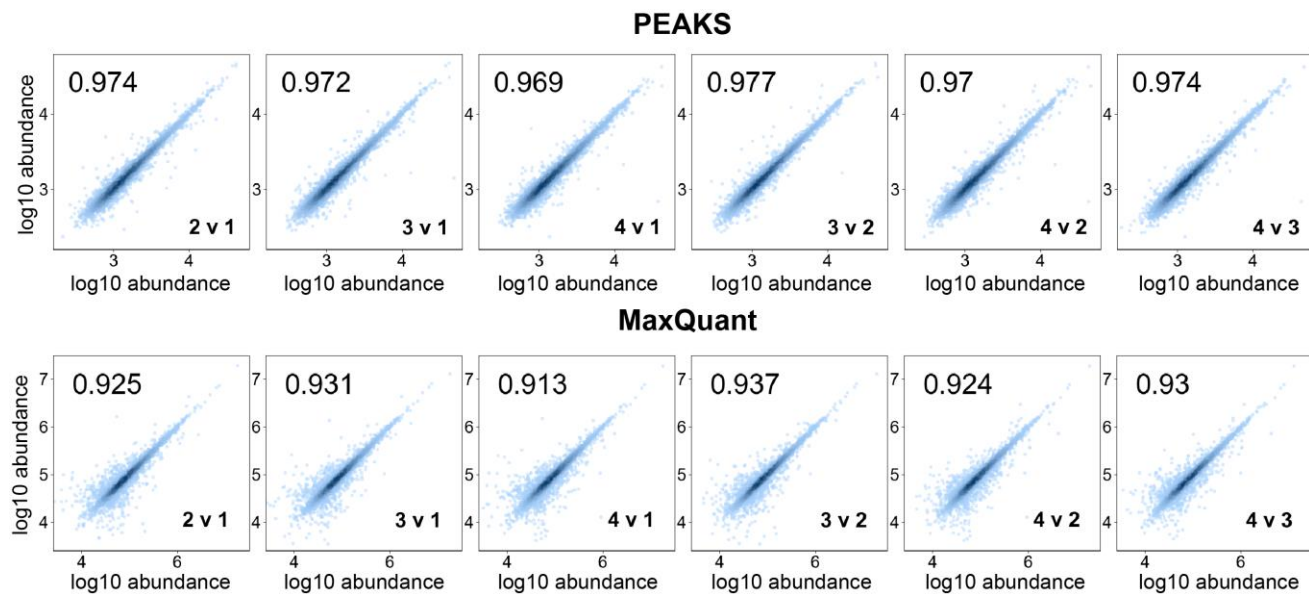

**Figure S1.** PEAKS and MaxQuant protein quantification compared between replicates. Comparisons are labeled in the lower right corner of each plot (e.g. '2 v 1', where protein abundances from replicate one are on the x-axis, and those from replicate two are plotted on the y-axis). Pearson correlation coefficients are shown in the upper left corner.

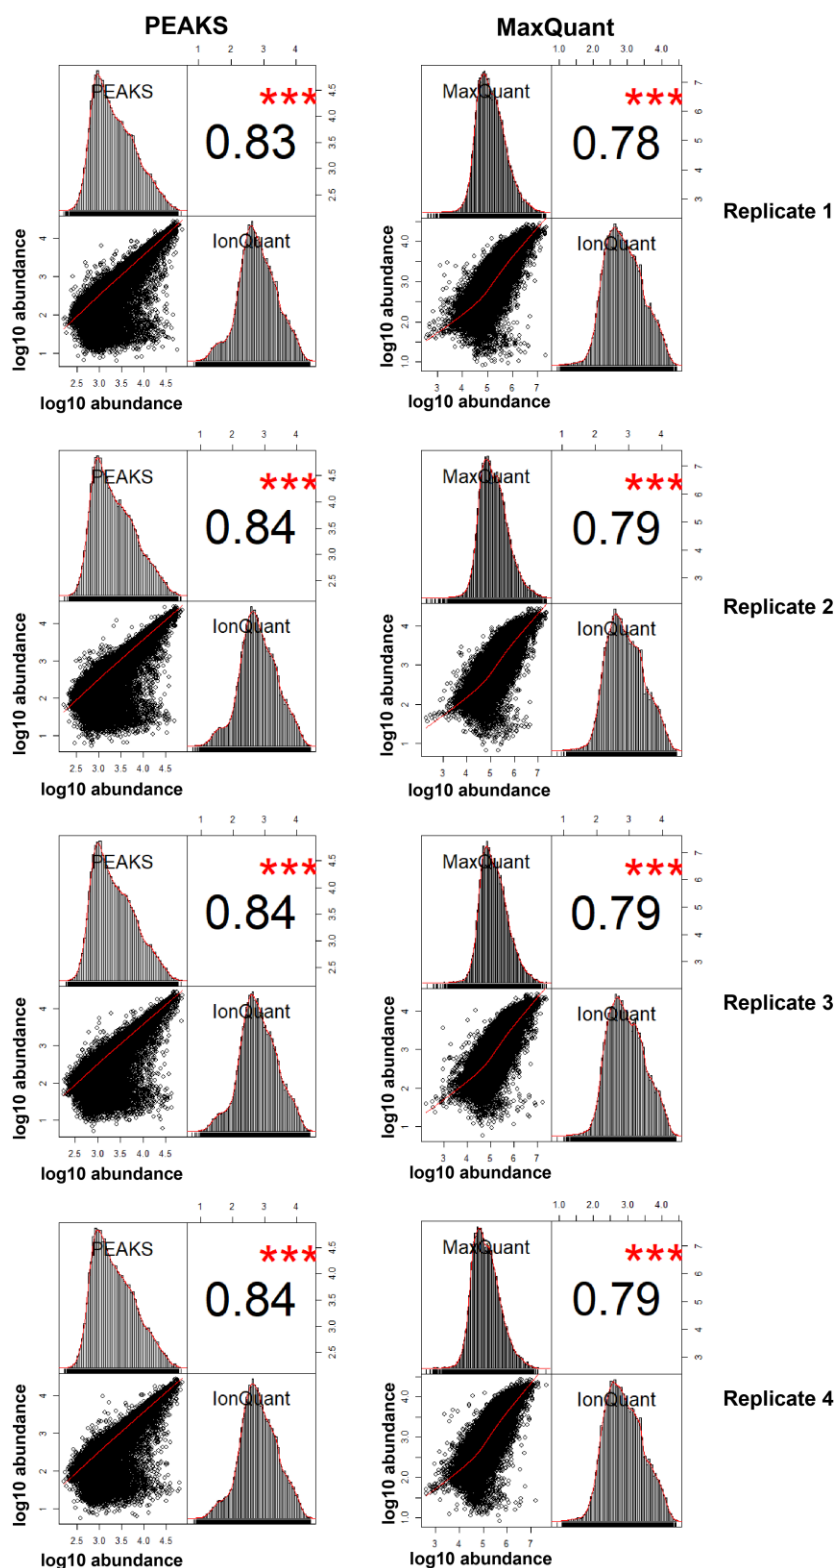

**Figure S2.** PEAKS (left column) and MaxQuant (right column) PSM quantification compared to IonQuant for each replicate. Within each scatterplot, IonQuant ion abundances are plotted on the y-axis. Pearson correlation coefficients are shown in the upper right quadrant of each plot, and histograms of peptide ion abundances are shown for each tool.

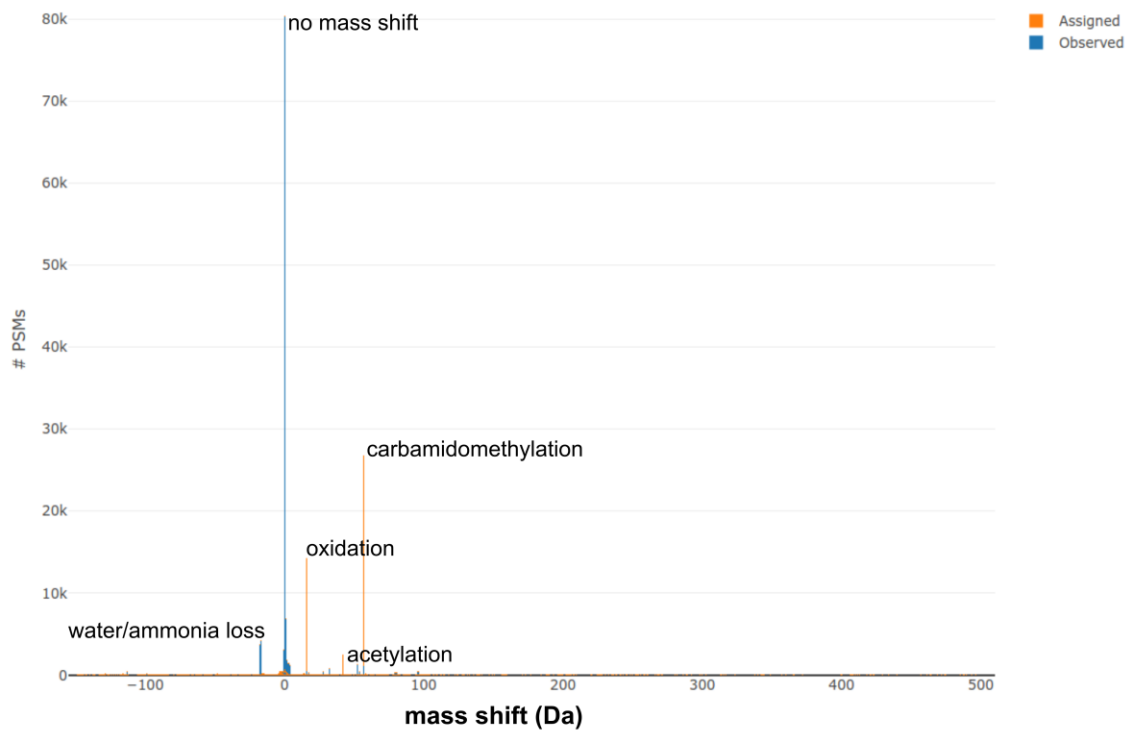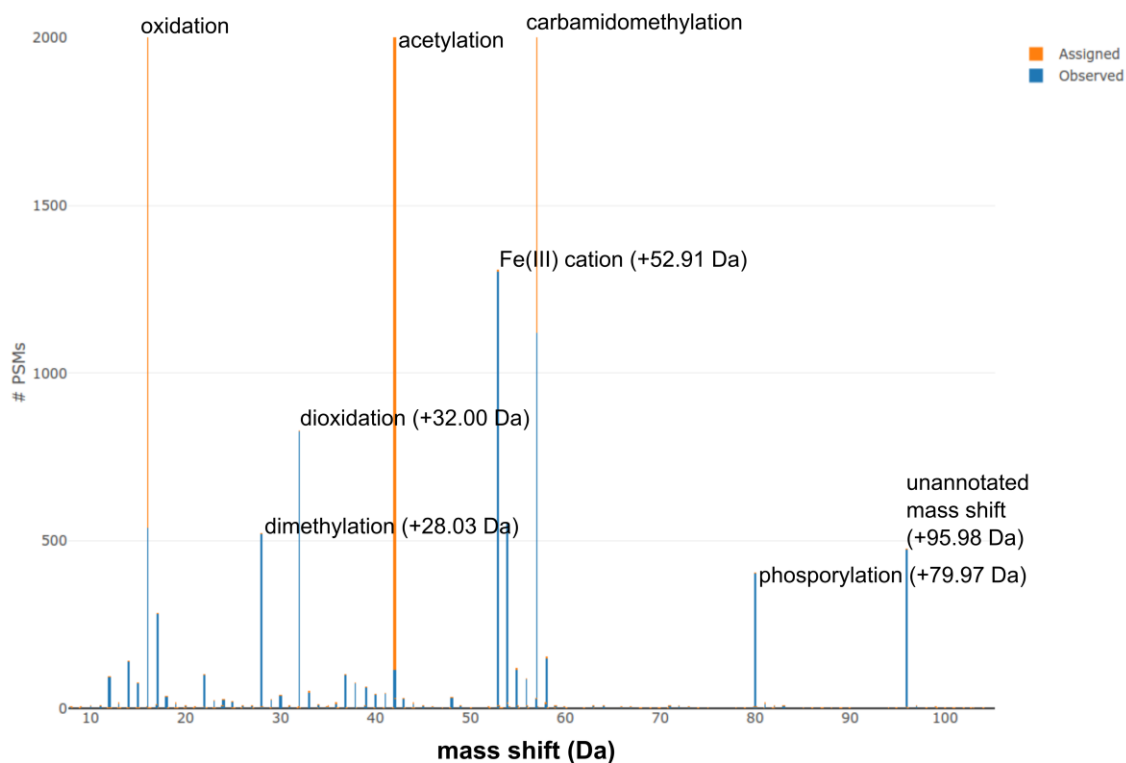

**Figure S3.** Mass shifts found by open searching one HeLa injection acquired using 100 ms accumulation time with MSFragger. Top, PSM count is shown for the full mass range (-150 to +500 Da). Bottom, detail of +10 to +100 Da (y-axis is also zoomed). Peaks in blue ('Observed') are annotated with likely modifications from Unimod, orange peaks ('Assigned') were those specified as variable modifications in the search.

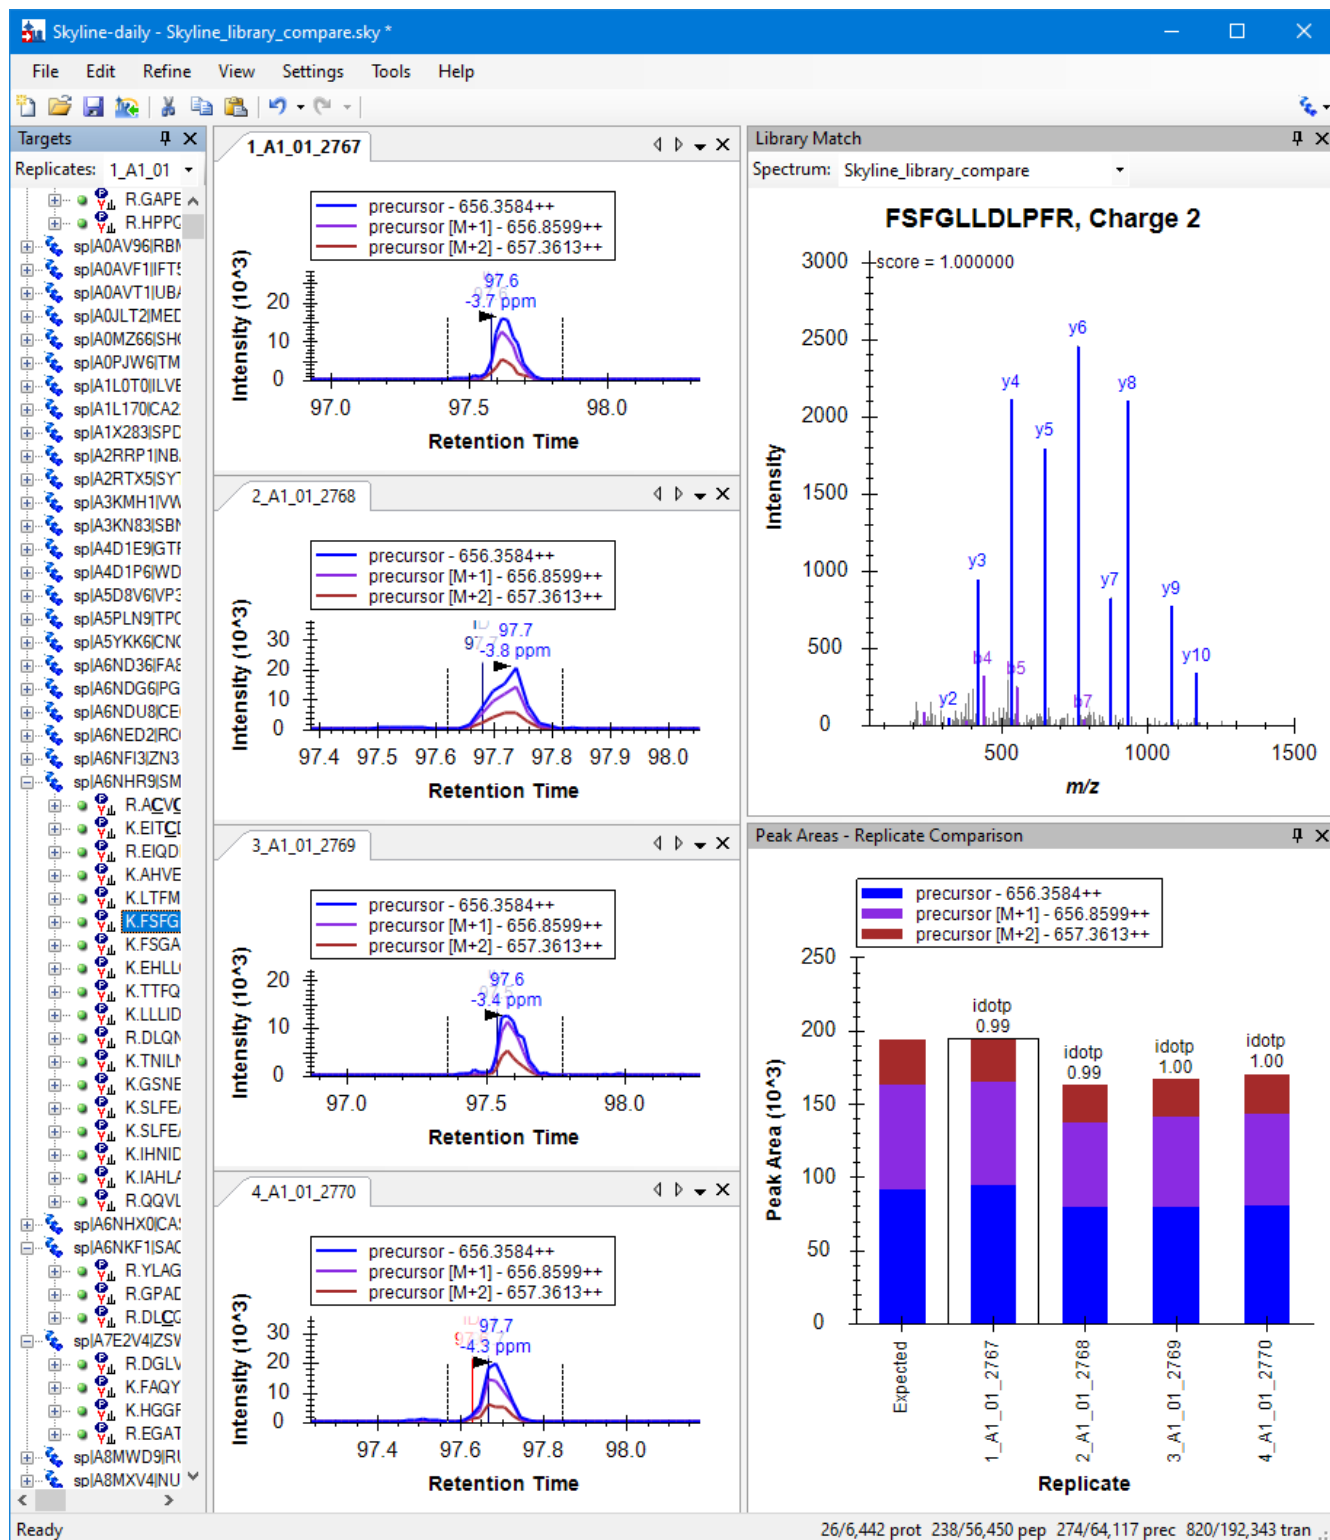

**Figure S4.** MSFragger results viewed in Skyline. Chromatograms and peak areas for the same peptide in four different replicates are shown after feature extraction using the Skyline spectral library.
